# Supplementary material for: A cold laboratory hyperspectral imaging system to map grain size and ice layer distributions in firn cores
Source: Copernicus journal article supplement (doi:10.5194/egusphere-2023-2351), 2023-11-01

## Author Response to Referee # 1 – Nicolas Stoll

### General comments

I enjoyed reading this manuscript by McDowell et al. as it is well written and valuable for the cryo, and especially firn, community. The authors describe a new imaging system based on hyperspectral imaging, which advances the possibilities to map stratigraphy and grain size in firn quickly. The manuscript is well-structured and clearly describes the technique, its results, and its possible limitations. The authors also tackle the tricky question of “what is grain size” and present a well-thought-out approach. I only have a few general thoughts, which are more questions than comments.

We greatly appreciate your careful consideration of the paper, and we are glad that you found the paper well-structured and well-reasoned. We address each of your comments below. Our responses to your comments are in blue, with any changes made to the paper written in *italics*.

I am interested in the total duration of a measurement session, and it would be great if the authors could elaborate on this a bit. How long does the entire procedure take, i.e., preparing the device and firn core, conducting the measurements, and processing the files? What's the longest you used it in the cold? I guess the question is if the scanner could be used in the field running all day long like a visual stratigraphy line scanner. This would be a real advantage in preventing post-depositional effects and the logistical difficulties of transporting firn cores to the cold lab.

Thank you for this suggestion. We have added a paragraph after line 165 in the previous draft discussing this:

*“Overall, imaging a single core in the cold laboratory took between 2–3 hours. Setting the focus of the NIR-HSI took between 20–30 minutes and required repeated scans to test the minor adjustments of the objective lens. Once the imager had been focused, unpacking and repackaging each firn core segment before and after the scan was the rate limiting step (~10 min). The scanning process itself took ~10 seconds, and each core consisted of approximately 10–15 seconds. Processing the images in the Spectranon Software (applying the dark correction, converting raw data to radiance, transforming radiance to reflectance) required < 5 minutes.”*

We also added a sentence at the end of line 190 in the previous draft to note how much time the grain size retrievals required.

*“Because of the high image resolution and large number of pixels, the inversion to retrieve grain radii lasted 5–10 minutes for each core.”*

We expound on potential difficulties of use in the field in response to specific comments below. While the imager itself is easily transportable, the biggest concern we have is leaving the imager in the cold for extended periods when not in use without some ability to heat it. See our comments on this below.

You mention the 16 firn cores drilled, but I would like to know if the two broken cores are important for this study. They are not used, and just ignoring them would increase the readability of the plots.

Thanks for raising this point; we appreciate any suggestion to make the paper and figures clearer. While we wish we could get grain size data from all 16 cores, the two missing cores here do not affect any results presented in the paper. We appreciate the suggestion to ignore the missing cores; however, we mention them in the paper because data from these cores have been presented in other publications (e.g., Lewis et al., 2019; Meehan et al., 2021). We wanted to remain consistent with the nomenclature developed during the GreenTrACS study and previously published, which is why we have cores 1-8,10-14, and 16.

Lewis, G., Osterberg, E., Hawley, R., Marshall, H. P., Meehan, T., Graeter, K., ... & Ferris, D. (2019). Recent precipitation decrease across the western Greenland ice sheet percolation zone. *The Cryosphere*, 13(11), 2797-2815.

Meehan, T. G., Marshall, H. P., Bradford, J. H., Hawley, R. L., Overly, T. B., Lewis, G., ... & McCarthy, F. (2021). Reconstruction of historical surface mass balance, 1984–2017 from GreenTrACS multi-offset ground-penetrating radar. *Journal of Glaciology*, 67(262), 219-228.

I only raised a few specific comments below. However, I am confident the authors can provide an updated version for those minor revisions, and I would be happy to see the edited manuscript published in the Cryosphere.

Thank you for providing these specific comments below, we believe they improved the presentation of the manuscript.

### **Specific comments**

L. 1: The phrasing of both ice sheets being “covered in a thick layer of firn” sounds a bit off. The firn thickness of roughly 40-120 m in Greenland and Antarctica is not thick in comparison to the ice sheet thickness. The meaning is clear, but it could be described clearer, e.g. “ice sheets contain a porous layer of firn”.

Thanks for the suggestion to make this sentence clearer. We have removed “thick” from the original sentence. It now reads “...ice sheets are covered in a layer of porous firn”. We think this sentence highlights that the firn layer is at the surface of ice sheets and contains open pore space.

L. 7: “required to test/implement into/check”, I am not sure if “to inform” is necessary. We have replaced “to inform” with “to check”.

L.8: I see the point that grain size measurements can be subjective, but that depends

strongly on the method. Microstructural analyses with e.g. fabric analysers or large area scanning microscopes of thin and thick sections, respectively, can provide good statistics decreasing the rate of subjectivity. To avoid this issue, you could change it to “Time consuming, and can be subjective depending on the method”.

That is a good point - thanks. We have added this phrasing to the sentence.

L. 22: I would switch the sentence to “interpreting previous atmospheric compositions via ice cores,...”.

We have reworded this part of the sentence. It now reads “...*interpreting previous atmospheric compositions using ice cores...*”

L. 27: Matter of definition, but in my opinion, firn belongs to the ice sheets and the firn volume is thus “of” or “within ice sheets”.

Good point. We changed “on” to “of”.

L. 30: A (half) sentence displaying the processes could help to connect the open porosity of firn fact with the changes in climate and the need for a better understanding, which I totally agree with.

Thanks for the suggestion. The end of this paragraph now reads:

*“The interconnected interstitial spaces between firn grains, i.e., open porosity, allows for gas, vapor, and liquid movement within the column; however, the total open porosity of the firn column is dependent on local climate conditions (e.g., Gregory et al., 2014) and can be progressively reduced by filling with meltwater (e.g., Harper et al., 2012). Therefore, an understanding of firn structure and properties, and their spatiotemporal evolution, is critical to determine how ice sheets respond to changes in climate.”*

L. 32: Including a new (in review) study could be of interest and would be good to include here to show the state of the art regarding optical methods on firn:

Westhoff, J., Freitag, J., Orsi, A., MarAnerie, P., Weikusat, I., Dyonisius, M., Fain, X., Fourteau, K., and Blunier, T.: Combining traditional and novel techniques to increase our understanding of the lock-in depth of atmospheric gases in polar ice cores - results from the EastGRIP region, EGU sphere [preprint], <https://doi.org/10.5194/egusphere-2023-1904>, 2023.

Thank you for pointing out this very interesting study. We have included it as a reference here on line 34.

L. 39: Again, a question of terminology, but I think “Microstructural properties” would be clearer than “grain-scale properties”. Grains could be mistaken for dust grains and thus a different scale.

Good point. We have changed “Grain-scale properties” to “*Microstructural properties*”.

L. 41: “firn layers” could be confusing here, because it refers to the total firn layer but might also refer to individual layers of firn. “Firn column” is clearer also used in the cited study by Gregory et al. (2014).

We understand that this could be confusing to readers. The two sentences here now read:

*“The relationship between gas diffusivity and firn permeability differs depending on firn grain size (Adolph and Albert, 2014) and pore close-off in finer-grained firn layers is reached at shallower depths in the firn column than it is for coarser-grained layers regardless of the density of the layers at depth (Gregory et al., 2014). These grain size effects must be accounted for when determining ice age – gas age differences in ice core records.”*

L. 68: You include microstructure mapping here, which also works on firn thick sections and is comparably fast and has a very high optical resolution:

Kipfstuhl, S., Faria, S. H., Azuma, N., Freitag, J., Hamann, I., Kaufmann, P., Miller, H., Weiler, K., and Wilhelms, F. (2009), Evidence of dynamic recrystallization in polar firn, *J. Geophys. Res.*, 114, B05204, doi:10.1029/2008JB005583.

Recent grain size measurements from ice thin sections via fabric analyser use pixels instead of radii/diameter and are thus able to reproduce a fairly accurate grain area, see e.g.

Stoll, N., Eichler, J., Hörhold, M., Erhardt, T., Jensen, C., and Weikusat, I.: Microstructure, microinclusions, and mineralogy along the EGRIP ice core – Part 1: Localisation of inclusions and deformation patterns, *The Cryosphere*, 15, 5717–5737, <https://doi.org/10.5194/tc-15-5717-2021>, 2021.

Nevertheless, both methods are limited to discrete samples and do not have the advantages of continuous measurements.

Thanks for these suggested references. This sentence and the following sentence now read:

*“Firn grain size datasets include “traditional” measurements produced by measuring the largest extent of grains using either a crystal card (e.g., Harper et al., 2003, thin sections (e.g., Gow, 1969; Alley et al., 1982), or digital photographs (e.g., McDowell et al., 2023); outlining grain boundaries in scanning electron microscope (SEM) scans (e.g., Spaulding et al., 2010); extracting grain or crystal boundaries by tracing thermal grooves from optical microscope images of sublimed microtomed thin/thick sections (e.g., Kipfstuhl et al., 2009; Stoll et al., 2021); or calculating the specific surface area in microcomputer tomography (microCT) measurements (e.g., Freitag et al., 2004; Linow et al., 2012). While these methods are time-consuming and tedious, they include additional downsides: measuring traditional grain extents visually can be subjective (e.g., Baunach et al., 2001; Leppänen et al., 2015), while sample preparation for microCT, SEM, and optical microscope analyses is destructive to existing cores and their small size limits their representativeness.”*

L. 72: Baunach et al. 2001 study laboratory grown snow kinetics and measure grain size along the way showing the subjective assessments of six experts. I am not sure if this is a

good example to conclude that the described methods above can be subjective. The study is more than two decades old and thus not state-of-the-art any more (as you show with the other cited studies). I am happy to be convinced that this study, and the conclusion you draw, are still as relevant as 2001; some rephrasing might help here. Without a doubt there are enough reasons to develop new methods to measure firn grain size fast and accurately. While we agree that there have been many advances in grain size observational techniques since 2001, we believe that including this phrase about subjectivity is important. Many grain size measurements from the field are still made by visually estimating the extent of grains. Additionally, because many grain growth parameterizations in snow/firn models were validated using traditional grain size estimates, we think it is important to note their subjectivity here. We have also included the reference to Leppänen et al. (2015), as they show that subjectivity is introduced to grain size estimates from digital photographs of snow grains. See the revised sentence above.

L. 74: The topic of the perfect grain size method/tool/parameter has been discussed for decades and there is still no obvious solution due to the 3D shape of grains and the spatial limitation of firn and ice cores. Averaging a large number of grains is thus necessary to obtain “good statistics”.

We agree with this point. This section is not meant to disparage other techniques, but rather to let readers know a gap that the hyperspectral images fill; that is, to provide continuous grain size profiles non-destructively. We have slightly revised the text here to make this point clearer. It now reads:

*“Grain size estimates produced using these techniques are averaged over the sample depth to obtain characteristic statistics and therefore do not produce continuous grain size profiles. Additionally, augmenting these records with ice layer stratigraphy requires visually inspecting firn cores or snowpit walls. These disadvantages motivate the development of a method that can quickly, continuously, and systematically map firn grain size and ice layer stratigraphy.”*

L. 80: You start with “Ice” and then switch to “snow grains”. Similar switching occurs in the sentences below. To avoid confusion, it would be good to stick with the same nomenclature of snow/ice grain/particle.

We have changed the wording in this paragraph to consistently use “snow grains” wherever we previously had written “ice particles”, “ice grains”, etc. We do keep “ice” in some places, since it is the absorptive property of ice itself that these techniques are leveraging.

L.. 89: maps of grain size...

Changed. Thanks for catching the typo.

L. 90: “in the field” not needed

Deleted.

L. 95-106: This reads more like a summary than the objective paragraph. To be more precise clearly state the objectives of your study here so the reader knows what to expect. It is a good paragraph, just at the wrong location.

Thanks for raising this point. We agree with you that this paragraph could be more focused to guide readers as to the objectives of this study. The new paragraph now reads:

*"This study was motivated by the need for high-resolution datasets of firn grain size and ice layer stratigraphy for a variety of firn research applications. We aimed to test the performance of a NIR-HSI system in retrieving accurate and continuous grain size profiles and ice layer distributions from 14 firn cores in a cold laboratory. To evaluate the efficacy of the NIR-HSI grain size retrievals, we (1) tested the sensitivity of retrieved effective grain sizes to the orientation of firn cores and the objective lens focus of the NIR-HSI; (2) compared the effective grain size retrievals with "traditional" grain size measurements colocated in 7 cores; and (3) correlated visual ice layer distributions with ice layer stratigraphy generated by the NIR-HSI. We demonstrate that scanning firn cores with a NIR-HSI is a robust technique for developing detailed grain size and ice layer profiles, and demonstrate an application of the high-resolution dataset to quantify structural changes to the firn column following the extreme 2012 summer melt event."*

L. 109. Maybe directly mention the number of firn cores here. In addition, it would be convenient to state the drilling method (hand-drill, hand-tausen, etc?) without having to read the cited publications.

We have specified that we scanned 14 firn cores in this sentence. Additionally at the end of the paragraph we have added:

*"All cores were collected using a hand auger with a sidewinder attachment and reached depths between 20 - 30 m."*

L. 120: I suspect via commercial companies dealing with frozen goods?

Yes, you are correct. The cores were transported from the field to a -20C freezer in Kangerlussuaq via twin otter aircraft. They were then flown to Schenectady, NY via a New York Air National Guard LC130 aircraft where the cores were loaded into a commercial freezer truck and delivered to Dartmouth College.

We have added *"via a commercial freezer truck"* to this sentence.

L. 121: ...chemical analysis of x using...?

We have revised this sentence to now say:

*"...sampled for chemical analysis of water isotopes and major ion concentrations using a continuous melting system..."*

L. 150: Just out of curiosity, what is the maximum time between measurements you let the device in the cold without using it? Could it be insulated to avoid removing after measurements? The maximum time that we left the imager in the cold room was about 2-3 hours (the longest length of time of a measurement session). The manufacturer guidelines recommend using the NIR-HSI in a temperature range of 5–40 C. Donahue et al. (2021, 2022) frequently used the imager in a cold room outside of this temperature range, and when the NIR-HSI was returned to the manufacturer for calibration, they noted that the optics were still aligned so the cold did not affect it. Other researchers have flown this sensor on a drone in the winter time which would also be outside of the manufacturers temperature range and it has performed well. However, we do not recommend leaving it in the cold laboratory full time or for long durations without use because insulating it won't be effective unless it is also heated.

L. 179: Nolin Dozier technique (Nolin and Dozier, 2000)  
Fixed.

L. 186: Did you play around with the impurity concentration? 0 ppb is very unlikely for natural settings especially in Greenland.  
You are correct that 0 ppb is not realistic for natural settings, but this is an acceptable simplification for grain size forward modeling because impurities lower reflectance primarily in the visible wavelengths. This impact does not extend out into the portion of the NIR spectrum used to retrieve grain size (wavelengths spanning the ice absorption feature centered at 1030 nm). A useful visualization of this can be found in Figure 2a,b from Bohn et al., 2021.

Bohn, N., Painter, T. H., Thompson, D. R., Carmon, N., Susiluoto, J., Turmon, M. J., ... & Guanter, L. (2021). Optimal estimation of snow and ice surface parameters from imaging spectroscopy measurements. *Remote Sensing of Environment*, 264, 112613. <https://doi.org/10.1016/j.rse.2021.112613>

We have added this statement of justification to the text:

*“While an impurity concentration of 0 ppb is not realistic for natural settings, it is an acceptable simplification for this forward modeling because light absorbing particles lower reflectance primarily in the visible wavelengths and this impact does not extend into the portion of the NIR spectrum used to retrieve grain size (Bohn et al., 2021)”*

L. 238: Should it be “deep (>10 m)”?

Yes, thanks for catching this. We have made this correction.

L- 240: number of ice layers

Fixed. Thanks for catching the typo.



Fig. 3: Do I understand it correctly that you measure effective grain size and then translate those values with a model to radii? So, it is not a direct measurement as one would assume from the figure? If the effective radii are shown please make that clear on the axis label or the caption. The legend with infiltration ice is slightly confusing, if it refers to the 2012 melt layer, why not mention it here and give it the same black and white line as in the plot. Apologies for the confusion. This point was also raised by the second reviewer. We have edited this figure to make the legend clearer. We also use “Effective grain radius” in our figure labels throughout the paper.

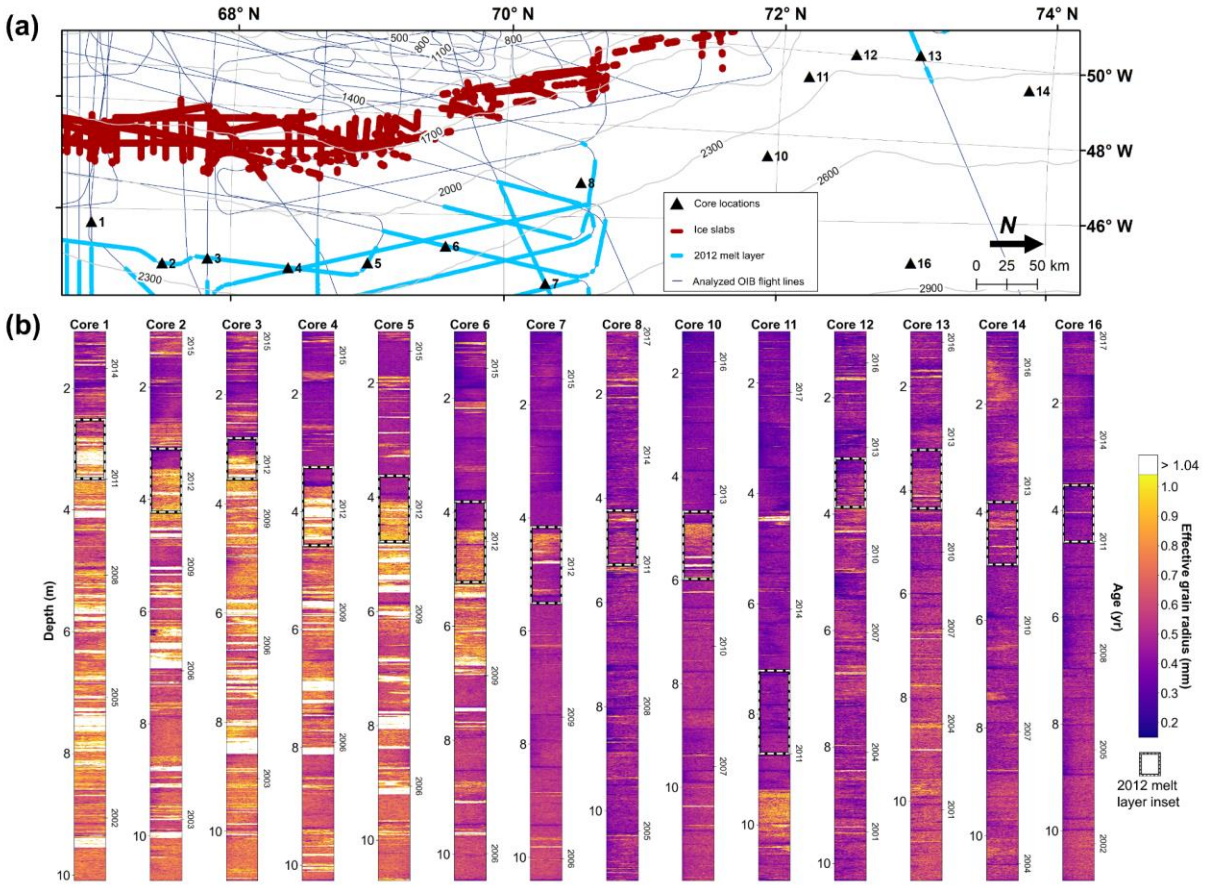

**Figure 5.** Firm core stratigraphy maps. (a) Inset map from Figure 1 with firm core locations labeled in black, impermeable ice slab extents in red (MacFerrin et al., 2019), and the 2012 melt layer detections in blue (Culberg et al., 2021). Operation IceBridge (OIB) flightlines analyzed by Culberg et al. (2021) are displayed as thin blue lines. (b) Firm core stratigraphy shaded by effective grain radius ( $r_e$ ). Pixels with an effective grain radius  $>1.04$  mm are classified as infiltration ice and masked. The black and white dashed extent indicators denote firm deposited between January 2011 and January 2013, which should have been affected by the extreme melt event of 2012, that are shown in Figure 8.

Fig. 4b: For a more precise comparison, it could be helpful to add the exact mean values for each core next to the dotted line.

We have revised this figure in response to a suggestion from Reviewer 2 to examine differences between grains in wetted firn sections and in dry firn sections. We have included the mean



values for the full core grain size comparisons, the wetted firn grain size comparisons, and the dry firn grain size comparisons in each subplot.

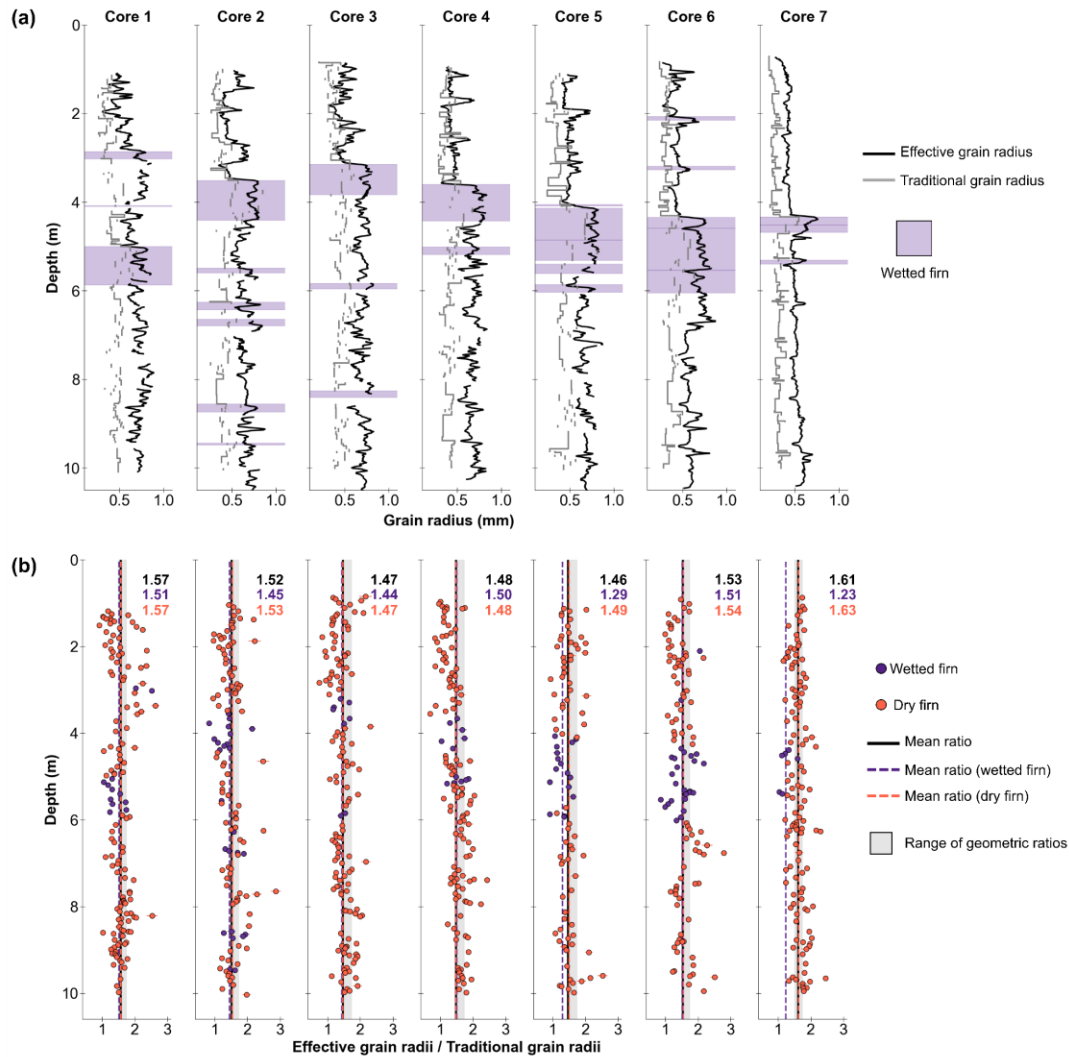

**Figure 6.** Effective vs. traditional grain sizes. (a) Grain size profiles from digital grain diameter measurements from McDowell et al. (2023) (grey) and from the NIR-HSI (black). Regions of refrozen firn indicating previous wetting from McDowell et al. (2023) are shown in light purple. (b) Ratios of effective grain sizes to traditional grain sizes. Dry firn grain ratios are shown in orange, while firn grains from previously-wetted regions are in purple. The dashed orange and purple lines represent the mean ratios of dry firn grains and wet firn grains respectively. The mean ratio from the full core is shown as a black line. Each ratio for the individual cores are written and colored corresponding to their classification. The light gray shading denotes the range of Effective/Traditional ratios expected given a hypothetical firn grain geometry of a truncated octahedra.

L. 284: depth bands could be confusing; I would exchange it to depth regimes.

To try to avoid confusion here, we have changed the wording from “depth bands” to “core segments”.

L. 290: State the three cores here.

We have replaced “3 of the cores” with “Cores 3 - 5”.

L. 312: To demonstrate this point, it would be helpful to see a high-resolution photograph of the characterized infiltration ice. Having a “real” image next to the depth regimes shown in A1 would be great. However, the samples might have been used for other purposes by now so this might not be an option anymore.

Thank you very much for this helpful suggestion. We have added photographs of the two regimes next to the hyperspectral maps.

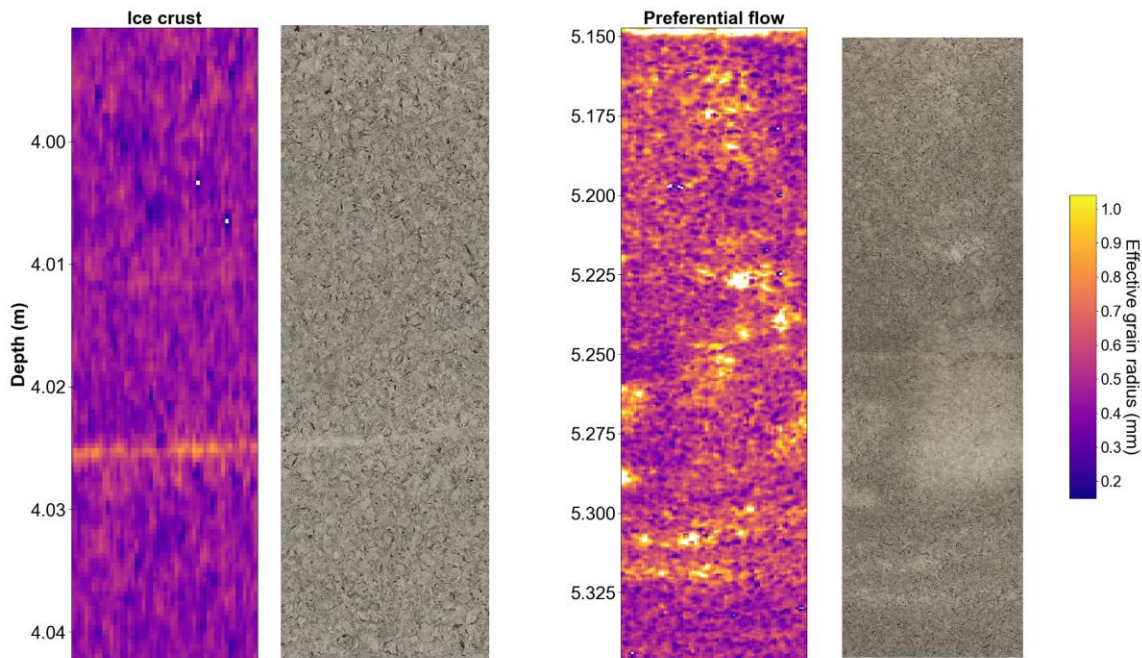

**Figure A2.** Left: Example of a monograin ice crust within Core 10. The ice crust is expressed by larger retrieved grain radii in a narrow band of pixels spanning the core width. A photograph of this feature is shown alongside the hyperspectral map. Right: Example of a preferential flow path found in Core 10. Wet grain growth during preferential flow causes the flow path to be easily detected during grain size retrievals. The two photographs corresponding to this map are stacked and shown on the right. Note the difference in depth scales.

Fig. 5 Having a similar plot concept as in Fig. 3 might be more accurate to display the infiltration ice. Now the impression could occur that the percentage/x-axis is the spatial area of infiltrated ice as is the case for visually inspected ice.

We appreciate your suggestion to improve the clarity of the figure. We have attempted multiple ways to show this comparison. However, we believe that the way it was presented here is the easiest way to visualize the comparison. You do raise an important point about possible

confusion. The x-axis now reads “% of Pixels Classified as Infiltration Ice in Hyperspectral Images” and we have re-written the figure caption to read:

*“Comparison of infiltration ice mapped by the NIR-HSI and identified by visual inspection. Profiles from the NIR-HSI are represented as the line-by-line percentage of pixels classified as infiltration ice (black line corresponding to the x-axis). The horizontal and vertical extent of ice layers identified on a light table is shown in blue.”*

L. 319: Is it possible (and maybe even planned) to test the device in the field? Packing, storing and shipping especially of snow and firn is always risky in regards of microstructure so of course it would be great to get these data in the field. The set-up seems to be portable enough to fit into a few Zarges boxes.

We don’t know of any concrete plans to take this system into glaciological field settings, but you are correct that it would be best to collect these data before any potential microstructural changes occur during transport and storage. The size of the imager certainly makes it easily transportable, and there has been previous work that mounts the imager on drones in cold field settings. The main limitations for a field setup would be creating a dark space with a nadir broadband illumination source (which could be difficult during polar summer in remote field settings) and a mechanism for keeping the imager warm when not in use while it is in the field for many days.

We included a short discussion of potential uses in the field in our Conclusions section:

*“Given the availability and transportability of NIR-HSIs, these instruments may provide opportunities to map firn microstructure in field settings, which would prevent post-depositional effects on firn structure during transport and storage. However, difficulties in using the NIR-HSI in remote field settings may arise from creating proper illumination conditions and keeping the imager warm when not in use to prevent the optics from becoming misaligned in conditions outside of the recommended range of operating temperatures. However, because firn grain size is important for many ice sheet research applications, we encourage the use of these systems in the lab or possibly in the field to constrain firn grain size across a wide variety of ice sheet settings.”*

Figure 6.a Just to be sure since it is not described, did you mirror the data after measuring the curved site? Some features look mirrored and could explain the visible difference between the left and right side of the core. If it is just a question of lighting, there are probably ways to fix it – how about attaching a strong light source directly to the images as is done for the visual stratigraphy line scanner from e.g. Schäfer+Kirchhoff used by AWI (<https://www.sukhamburg.com/products/linescancamera/scannersystems/microstructuremapping/ilcs.html>)?

We have checked this figure and the data have not been mirrored. The differences solely come from centimeter-scale differences in infiltration ice. We agree that mounting a lighting source directly to the imager would partially-remedy the cross-core gradient in grain sizes. However, we did not have a lighting system like this available to use for this project. Furthermore, a curved

firn core surface would still present difficulties. By imaging a curved surface, not only does the local illumination angle change, but the viewing angle also changes at that point. This has large implications for the magnitude of measured reflectance due to the anisotropic forward scattering of snow/ice grains. If these angles are small, the effects will likely be minimal, but along a curved firn core you approach large grazing angles which would likely produce large differences in reflectance regardless of the light source. We have added to the paragraph originally on lines 334-341:

*“While a nadir light source, e.g., lamps mounted directly around the imager's lens similar to the setup in Donahue et al. (2022), might remedy the cross-core gradient in retrieved grain size, imaging a curved core with the NIR-HSI will still present challenges. The curvature of a firn sample changes the angular distribution of reflected radiation. Along the core edges, the grazing angle of the illumination source becomes large, which will reduce measured reflectance from forward scattering. Therefore, we recommend any detailed analyses of firn structure using the NIR-HSI be conducted on half-round firn cores.”*

L. 336: Latex format error /sim.

Fixed. Thanks for catching this Latex error.

L. 351: It is very reassuring that the focus does not play a major role for grain size analysis.

That will make the deployment much easier and less experienced people can easily take over during a measurement campaign. Great that you checked this in advance.

Thanks for your positive comment. We agree that it is indeed a nice result that minor changes in focus will not affect results.

Fig 7b. I see the logic in the arrangement of a, b, and c, but having wider histogram plots in b) would increase the visibility of the two regimes.

We agree that the histograms were difficult to see. We have changed these to violin plots and we hope this improves the visibility.

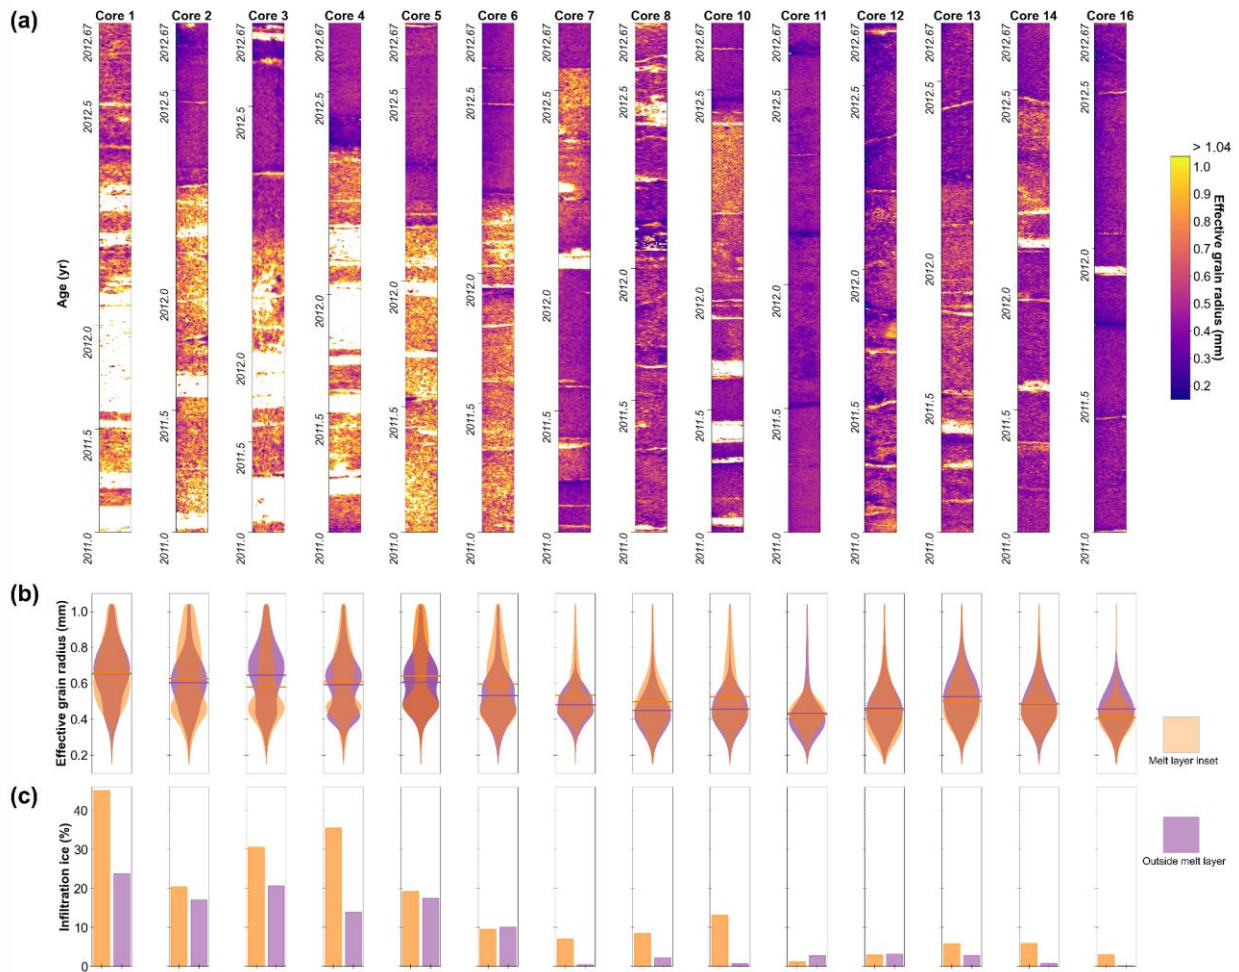

**Figure 8.** Firm structure within/outside of the 2012 melt layer. (a) Grain size and ice layer maps of firm spanning the 2012 melt layer from 1 September 2012 to 1 January 2011. Pixels with a retrieved effective grain radius  $>1.04$  mm are classified as infiltration ice and masked. The thin bands of smaller effective grain size retrievals are artifacts caused by lighting effects at the ends of firm core segments that have not completely been removed by image cropping. (b) Violin plots showing grain size differences from firm within the melt layer (orange) and outside of the melt layer (purple). Horizontal lines represent the means of the grain size distributions. (c) Bar charts quantifying the amount of infiltration ice found within the 2012 melt layer (orange) and outside of the melt layer (purple). Table A1 contains values of the mean  $\pm$  standard deviation grain sizes and total infiltration ice content in firm within and outside of the 2012 melt layer.

L. 402: Since they are labeled Core 1-16, I would write “Core 16”.

Done.

Figure 8 caption: b) instead of c); 2012 melt layer (pink); standard deviation of/in grain sizes  
 Thanks for catching these typos in the figure caption. These have been fixed.

L. 407: Here you only refer to the 14 undamaged firn cores. It might make sense to exclude the two damaged ones completely and thus have easier labels (Core 1-14).



Thanks for the suggestion to improve clarity. Please see our previous comment on our reasoning behind keeping the original nomenclature from the GreenTrACS study (to remain consistent with other studies presenting data from the same cores).

Fig. A4: The legend for the mean annual air temperature seems to be missing. Sorry about that. We have added the legend of mean air temperatures. Thanks for catching this! Here is the new figure below:

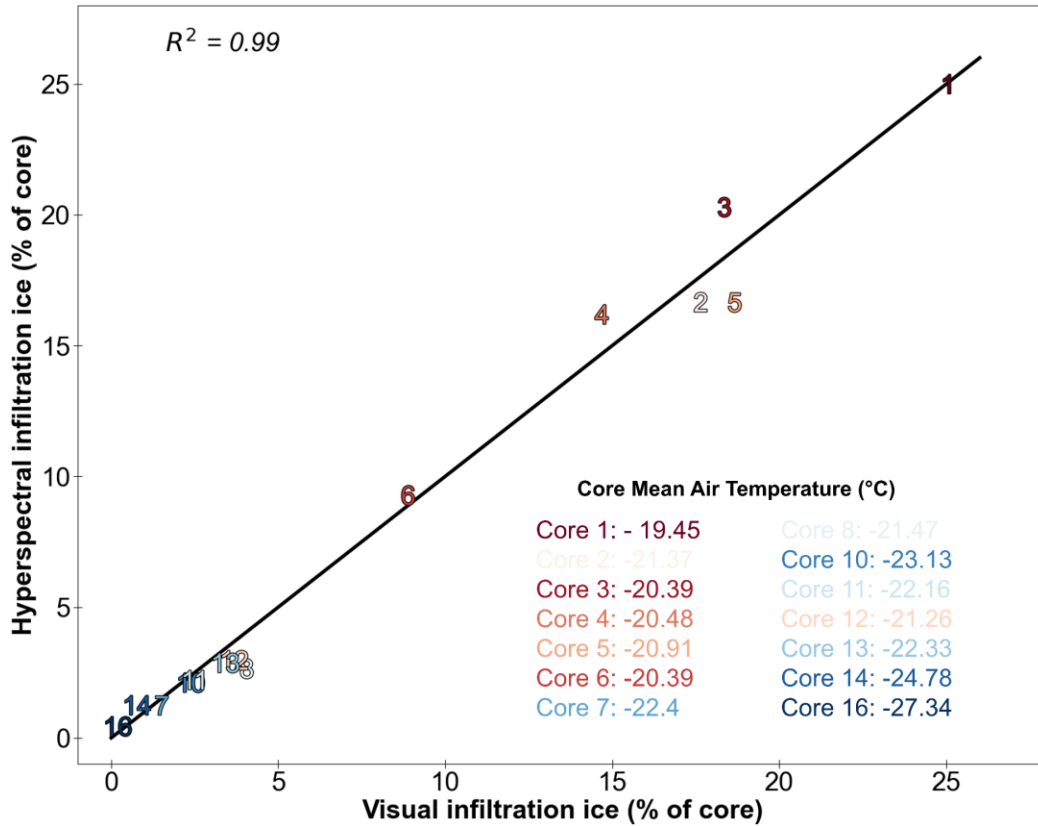

Supplement: Supplementary file [file egusphere-2023-2351-AC1-supplement.pdf]
